# Supplementary material for: Participatory Methods to Engage Health Service Users in the Development of Electronic Health Resources: Systematic Review
Source: PubMed Central journal article supplement (PMC7434099; doi:10.2196/11474), 2019-02-22
Supplement: jopm_v11i1e11474_app5.pdf [file jopm_v11i1e11474_app5.pdf]

| <b>Technology</b>      | <b>Total MMAT rated studies<br/>n=90 (%)</b> | <b>References (studies may include more than one reference)</b>                                                                                              |
|------------------------|----------------------------------------------|--------------------------------------------------------------------------------------------------------------------------------------------------------------|
| Website                | 56 (62%)                                     | [27, 31, 34, 37-39, 44-52, 58, 60-66, 68, 72, 74-80, 83, 85-89, 91-101, 103-105, 107, 108, 110-113, 118, 119, 121, 122, 125-127, 129-131, 134, 136, 140-143] |
| Mobile Application     | 32 (36%)                                     | [26-30, 32, 35, 36, 40-43, 53-57, 59, 70, 71, 81, 82, 84, 95, 97, 98, 102, 109, 114-117, 120, 124, 128, 133, 135, 137-139]                                   |
| Decision Tool          | 5 (6%)                                       | [58, 68, 106, 121, 141]                                                                                                                                      |
| Personal Health Record | 3 (3%)                                       | [40, 41, 67, 69, 74]                                                                                                                                         |
| Wearable Device        | 2 (2%)                                       | [90, 123, 132]                                                                                                                                               |
| Handheld Computer      | 1 (1%)                                       | [33]                                                                                                                                                         |
| Kiosk Application      | 1 (1%)                                       | [106]                                                                                                                                                        |
| Serious Game           | 1 (1%)                                       | [92, 93]                                                                                                                                                     |
| Telemonitoring         | 1 (1%)                                       | [74]                                                                                                                                                         |
